# Supplementary material for: Structural and photodynamic properties of the anti-cancer drug irinotecan in aqueous solutions of different pHs
Source: Royal Society of Chemistry journal article supplement (doi:10.1039/c8cp01134f), 2018-01-01
Supplement: c8cp01134f1.pdf [file c8cp01134f1.pdf]

# **Structural and Photodynamic Properties of the Anti-Cancer Drug Irinotecan in Aqueous Solutions of Different pHs**

Maria Rosaria di Nunzio,<sup>a</sup> Yasmin Douhal,<sup>b,‡</sup> Juan Angel Organero,<sup>a</sup> Abderrazzak  
Douhal<sup>a\*</sup>

<sup>a</sup>Departamento de Química Física, Facultad de Ciencias Ambientales y Bioquímica, and  
INAMOL, Universidad de Castilla-La Mancha, Avenida Carlos III, S/N, 45071 Toledo,  
Spain

<sup>b</sup>Facultad de Farmacia, Universidad de Castilla-La Mancha, Paseo de los Estudiantes,  
S/N, 02071 Albacete, Spain.

<sup>‡</sup>Present address: Hospital Universitario de Getafe, Carretera de Toledo, km 12.5, 28905,  
Getafe (Madrid), Spain.

\*corresponding author: Abderrazzak.Douhal@uclm.es

Phone number: +34-925-265717

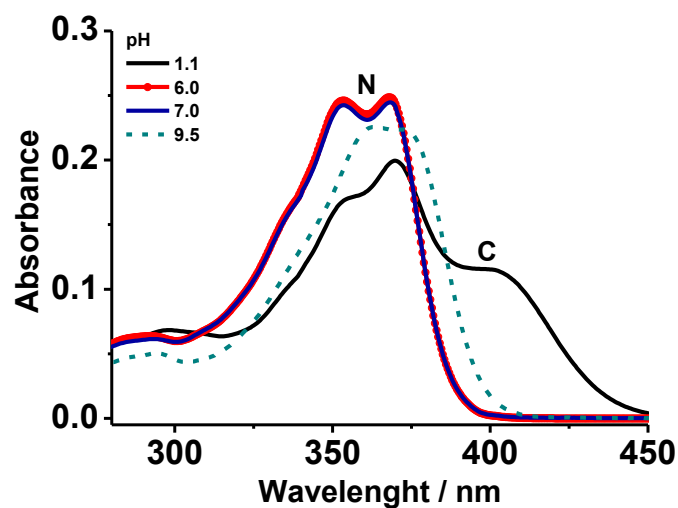

**Figure S1.** UV-visible absorption spectra of camptothecin (CPT) in aqueous solutions as a function of pH. The  $S_0 \rightarrow S_1$  absorption bands of neutral and cationic species are marked as N and C, respectively. Data at pH = 1.1 and 6.0 are from Ref. 40.

#### Determination of $pK_a^*$ ( $S_1$ ):

The plot of the fluorescence intensities vs pH at 433 and 610 nm, where C1 or C2 – respectively – mainly emit, is presented in Figure S2.

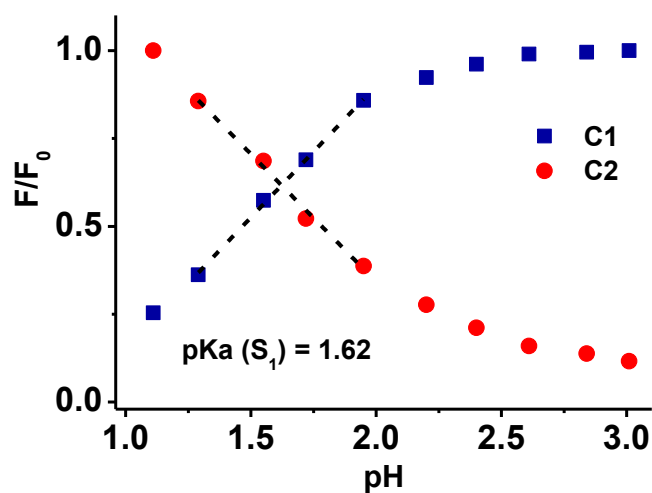

**Figure S2.** Fluorescence intensity changes of C1 (■,  $\lambda_{em} = 433$  nm) and C2 (●,  $\lambda_{em} = 610$  nm) structures with the pH of the medium.

The excited-state  $pK_a$  ( $pK_a^*$ ) was obtained by determining the pH of the point of intersection between the two linear curves as shown in Figure S2 (black dashed lines). To determine this point, we solved the linear equations of the four points closest to the junction at each curve (S1):

$$0.74811x - 0.59666 = -0.72711x + 1.79605 \quad (S1)$$

Where 
$$x = \frac{2.39271}{1.47522} \quad (S2)$$

Therefore, 
$$pK_a^* = 1.62$$

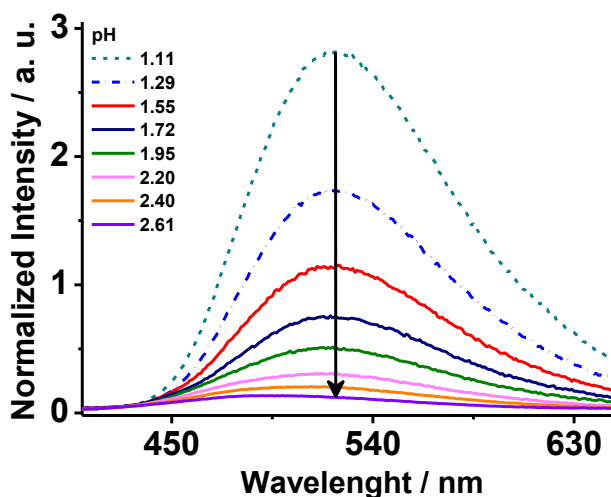

**Figure S3.** Emission spectra of IRT in acidic aqueous solutions (pH = 1.11–2.61). The excitation wavelength is at 400 nm.

### Correction of the Emission Spectra in the 1.11–2.61 pH range:

At low concentrations (absorbance < 0.1), the fluorescence intensity approaches a linear expression:

$$F_\lambda = k' I_0 (\log \epsilon l c) = K l c \quad (S3)$$

where  $F_\lambda$  is the fluorescence intensity at a given wavelength of excitation,  $k'$  is a rate constant that takes into account the fluorescence quantum yield,  $\epsilon$  is the extinction coefficient at the excitation wavelength,  $l$  is the optical path, and  $c$  is the concentration of the fluorophore.

Taking into account Equation S3 for diluted aqueous IRT solutions, we corrected the emission spectra of the drug in the 1.11–2.61 pH range by Equation S4:

$$F_{\lambda}^{corr}(pH) = F_{\lambda} \times (A_{2.61}^{371} / A_{pH}^{371}) \quad (S4)$$

where  $F_{\lambda}^{corr}(pH)$  is the corrected  $F_{\lambda}$  at a given pH, while  $A_{2.61}^{371}$  and  $A_{pH}^{371}$  are the absorbance values at 371 nm at pH 2.61 and at the given pH, respectively. The corrected emission spectra in the 1.11–2.61 pH range are shown in Figure S4:

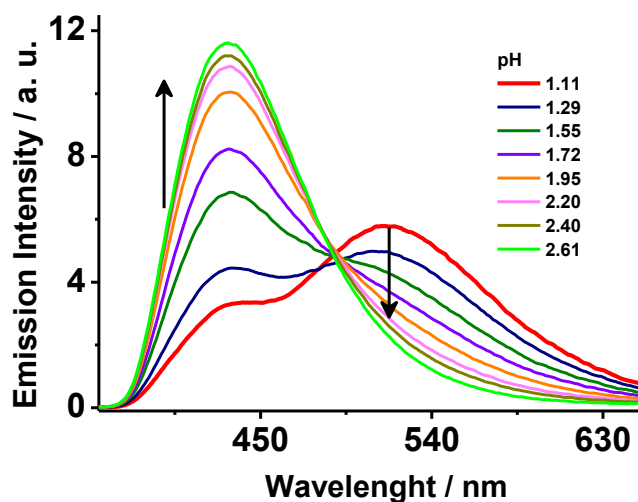

**Figure S4.** Corrected emission spectra of IRT in acidic aqueous solutions (pH = 1.11–2.61). The excitation wavelength is at 371 nm.

### Picosecond to Nanosecond Time-Resolved Measurements

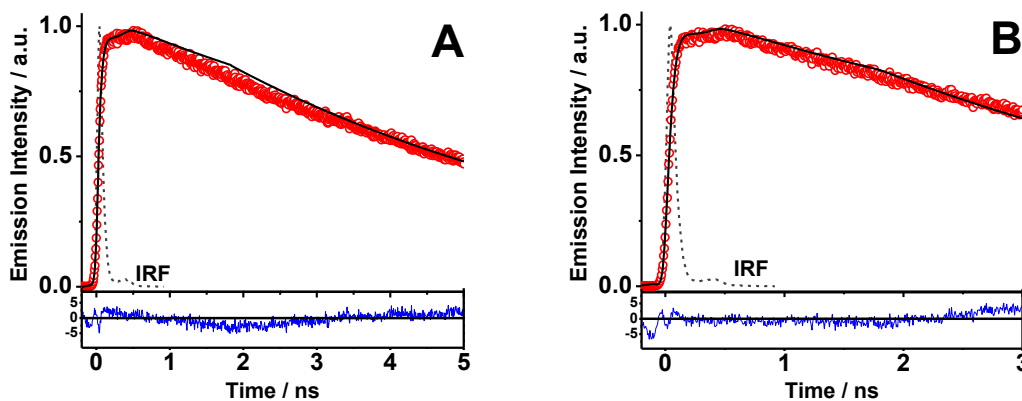

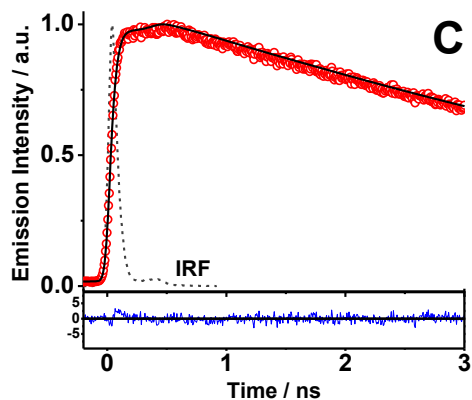

**Figure S5.** Normalized (to the maximum of intensity) magic-angle emission decay of IRT in aqueous solution at pH = 2.6 observing at 630 nm and fitting to a mono-exponential (A) or bi-exponential function including a 100 ps- (B) or 3 ns- (C) rise time. The residual distribution is also shown for each fit. IRF is the instrumental response function (~70 ps). The excitation wavelength is at 371 nm.

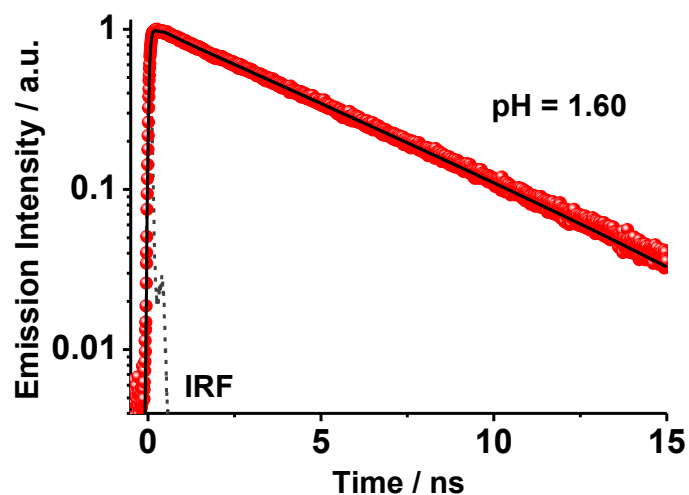

**Figure S6.** Normalized (to the maximum of intensity) magic-angle emission decay of IRT in aqueous solution at pH 1.60 observing at 600 nm. IRF is the instrumental response function (~70 ps). The excitation wavelength is at 433 nm.

**Irinotecan in water at different pH values (Exc = 371 nm)**

| <b>pH = 1.11</b>  |             |                   |             |                   |
|-------------------|-------------|-------------------|-------------|-------------------|
| $\lambda_{em}/nm$ | $\tau_1/ns$ | A <sub>1</sub> /% | $\tau_2/ns$ | A <sub>2</sub> /% |
| 400               | 1.3         | 99.7              | 4.6         | 0.3               |
| 450               |             | 95                |             | 5                 |
| 475               |             | 67                |             | 33                |
| 500               |             | (-)5              |             | 95                |
| 550               |             | (-)37             |             | 63                |
| 600               |             | (-)40             |             | 60                |
| 630               |             | (-)40             |             | 60                |

| <b>pH = 1.29</b>  |             |                   |             |                   |
|-------------------|-------------|-------------------|-------------|-------------------|
| $\lambda_{em}/nm$ | $\tau_1/ns$ | A <sub>1</sub> /% | $\tau_2/ns$ | A <sub>2</sub> /% |
| 400               | 1.5         | 99.5              | 4.6         | 0.5               |
| 450               |             | 96                |             | 4                 |
| 475               |             | 69                |             | 31                |
| 500               |             | (-)1              |             | 99                |
| 550               |             | (-)39             |             | 61                |
| 600               |             | (-)42             |             | 58                |
| 630               |             | (-)43             |             | 57                |

| <b>pH = 1.55</b>  |             |                   |             |                   |
|-------------------|-------------|-------------------|-------------|-------------------|
| $\lambda_{em}/nm$ | $\tau_1/ns$ | A <sub>1</sub> /% | $\tau_2/ns$ | A <sub>2</sub> /% |
| 400               | 2.0         | 99                | 4.6         | 1                 |
| 450               |             | 96                |             | 4                 |
| 475               |             | 73                |             | 27                |
| 500               |             | 9                 |             | 91                |
| 550               |             | (-)40             |             | 60                |
| 600               |             | (-)44             |             | 56                |
| 630               |             | (-)45             |             | 55                |

| <b>pH = 1.72</b>  |             |                   |             |                   |
|-------------------|-------------|-------------------|-------------|-------------------|
| $\lambda_{em}/nm$ | $\tau_1/ns$ | A <sub>1</sub> /% | $\tau_2/ns$ | A <sub>2</sub> /% |
| 400               | 2.3         | 98                | 4.7         | 2                 |
| 450               |             | 95                |             | 5                 |
| 475               |             | 77                |             | 23                |
| 500               |             | 22                |             | 78                |
| 550               |             | (-)39             |             | 61                |
| 600               |             | (-)44             |             | 56                |
| 630               |             | (-)45             |             | 55                |

| <b>pH = 1.95</b>  |             |                   |             |                   |
|-------------------|-------------|-------------------|-------------|-------------------|
| $\lambda_{em}/nm$ | $\tau_1/ns$ | A <sub>1</sub> /% | $\tau_2/ns$ | A <sub>2</sub> /% |
| 400               | 2.7         | 98                | 4.7         | 2                 |
| 450               |             | 96                |             | 4                 |
| 475               |             | 82                |             | 18                |
| 500               |             | 41                |             | 59                |
| 550               |             | (-)36             |             | 64                |
| 600               |             | (-)43             |             | 57                |
| 630               |             | (-)44             |             | 56                |

| <b>pH = 2.20</b>  |             |                   |             |                   |
|-------------------|-------------|-------------------|-------------|-------------------|
| $\lambda_{em}/nm$ | $\tau_1/ns$ | A <sub>1</sub> /% | $\tau_2/ns$ | A <sub>2</sub> /% |
| 400               | 2.9         | 96                | 4.7         | 4                 |
| 450               |             | 95                |             | 5                 |
| 475               |             | 86                |             | 14                |
| 500               |             | 57                |             | 43                |
| 550               |             | (-)29             |             | 71                |
| 600               |             | (-)41             |             | 59                |
| 630               |             | (-)43             |             | 57                |

| pH = 2.40         |             |                   |             |                   |
|-------------------|-------------|-------------------|-------------|-------------------|
| $\lambda_{em}/nm$ | $\tau_1/ns$ | A <sub>1</sub> /% | $\tau_2/ns$ | A <sub>2</sub> /% |
| 400               | 3.1         | 95                | 4.8         | 5                 |
| 450               |             | 94                |             | 6                 |
| 475               |             | 88                |             | 12                |
| 500               |             | 68                |             | 32                |
| 550               |             | (-)15             |             | 85                |
| 600               |             | (-)37             |             | 63                |
| 630               |             | (-)40             |             | 60                |

| pH = 2.61         |             |                   |             |                   |
|-------------------|-------------|-------------------|-------------|-------------------|
| $\lambda_{em}/nm$ | $\tau_1/ns$ | A <sub>1</sub> /% | $\tau_2/ns$ | A <sub>2</sub> /% |
| 400               | 3.2         | 93                | 4.8         | 7                 |
| 450               |             | 93                |             | 7                 |
| 475               |             | 89                |             | 11                |
| 500               |             | 78                |             | 22                |
| 550               |             | 28                |             | 72                |
| 600               |             | (-)23             |             | 77                |
| 630               |             | (-)29             |             | 71                |

| pH = 2.84         |             |                   |             |                   |
|-------------------|-------------|-------------------|-------------|-------------------|
| $\lambda_{em}/nm$ | $\tau_1/ns$ | A <sub>1</sub> /% | $\tau_2/ns$ | A <sub>2</sub> /% |
| 400               | 3.2         | 92                | 4.9         | 8                 |
| 450               |             | 92                |             | 8                 |
| 475               |             | 90                |             | 10                |
| 500               |             | 83                |             | 17                |
| 550               |             | 57                |             | 43                |
| 600               |             | 18                |             | 82                |
| 630               |             | 0.4               |             | 99.6              |

| pH = 3.01         |             |                   |             |                   |
|-------------------|-------------|-------------------|-------------|-------------------|
| $\lambda_{em}/nm$ | $\tau_1/ns$ | A <sub>1</sub> /% | $\tau_2/ns$ | A <sub>2</sub> /% |
| 400               | 3.2         | 91                | 4.9         | 9                 |
| 450               |             | 90                |             | 10                |
| 475               |             | 89                |             | 11                |
| 500               |             | 86                |             | 14                |
| 550               |             | 72                |             | 28                |
| 600               |             | 51                |             | 49                |
| 630               |             | 41                |             | 59                |

| pH = 3.56         |             |                   |             |                   |
|-------------------|-------------|-------------------|-------------|-------------------|
| $\lambda_{em}/nm$ | $\tau_1/ns$ | A <sub>1</sub> /% | $\tau_N/ps$ | A <sub>2</sub> /% |
| 400               | 3.5         | 95                | 800         | 5                 |
| 450               |             | 95                |             | 5                 |
| 475               |             | 95                |             | 5                 |
| 500               |             | 95                |             | 5                 |
| 550               |             | 95                |             | 5                 |
| 600               |             | 96                |             | 4                 |
| 630               |             | 96                |             | 4                 |

| pH = 4.06         |             |                   |             |                   |
|-------------------|-------------|-------------------|-------------|-------------------|
| $\lambda_{em}/nm$ | $\tau_1/ns$ | A <sub>1</sub> /% | $\tau_N/ps$ | A <sub>2</sub> /% |
| 400               | 3.6         | 93                | 800         | 7                 |
| 450               |             | 93                |             | 7                 |
| 475               |             | 94                |             | 6                 |
| 500               |             | 94                |             | 6                 |
| 550               |             | 95                |             | 5                 |
| 600               |             | 95                |             | 5                 |
| 630               |             | 94                |             | 6                 |

| pH = 4.56         |             |          |             |          |
|-------------------|-------------|----------|-------------|----------|
| $\lambda_{em}/nm$ | $\tau_1/ns$ | $A_1/\%$ | $\tau_N/ps$ | $A_2/\%$ |
| 400               | 3.8         | 89       | 800         | 11       |
| 450               |             | 89       |             | 11       |
| 475               |             | 89       |             | 11       |
| 500               |             | 88       |             | 12       |
| 550               |             | 85       |             | 15       |
| 600               |             | 82       |             | 18       |
| 630               |             | 77       |             | 23       |

| pH = 5.13         |             |          |             |          |
|-------------------|-------------|----------|-------------|----------|
| $\lambda_{em}/nm$ | $\tau_1/ns$ | $A_1/\%$ | $\tau_N/ps$ | $A_2/\%$ |
| 400               | 3.8         | 87       | 800         | 13       |
| 450               |             | 87       |             | 13       |
| 475               |             | 86       |             | 14       |
| 500               |             | 85       |             | 15       |
| 550               |             | 82       |             | 18       |
| 600               |             | 79       |             | 21       |
| 630               |             | 75       |             | 25       |

| pH = 6.01         |             |          |             |          |
|-------------------|-------------|----------|-------------|----------|
| $\lambda_{em}/nm$ | $\tau_1/ns$ | $A_1/\%$ | $\tau_N/ps$ | $A_2/\%$ |
| 400               | 3.8         | 87       | 812         | 13       |
| 450               |             | 87       |             | 13       |
| 475               |             | 85       |             | 15       |
| 500               |             | 84       |             | 16       |
| 550               |             | 81       |             | 19       |
| 600               |             | 76       |             | 24       |
| 630               |             | 74       |             | 26       |

| pH = 6.56         |             |          |             |          |
|-------------------|-------------|----------|-------------|----------|
| $\lambda_{em}/nm$ | $\tau_1/ns$ | $A_1/\%$ | $\tau_N/ps$ | $A_2/\%$ |
| 400               | 3.8         | 88       | 810         | 12       |
| 450               |             | 88       |             | 12       |
| 475               |             | 87       |             | 13       |
| 500               |             | 86       |             | 14       |
| 550               |             | 84       |             | 16       |
| 600               |             | 81       |             | 19       |
| 630               |             | 78       |             | 22       |

| pH = 7.00         |             |          |             |          |
|-------------------|-------------|----------|-------------|----------|
| $\lambda_{em}/nm$ | $\tau_1/ns$ | $A_1/\%$ | $\tau_N/ps$ | $A_2/\%$ |
| 400               | 3.8         | 89       | 810         | 11       |
| 450               |             | 89       |             | 11       |
| 475               |             | 89       |             | 11       |
| 500               |             | 89       |             | 11       |
| 550               |             | 89       |             | 11       |
| 600               |             | 88       |             | 12       |
| 630               |             | 86       |             | 14       |

| pH = 9.46         |             |          |             |          |
|-------------------|-------------|----------|-------------|----------|
| $\lambda_{em}/nm$ | $\tau_1/ns$ | $A_1/\%$ | $\tau_N/ps$ | $A_2/\%$ |
| 400               | 3.9         | 85       | 813         | 15       |
| 450               |             | 85       |             | 15       |
| 475               |             | 84       |             | 16       |
| 500               |             | 82       |             | 18       |
| 550               |             | 79       |             | 21       |
| 600               |             | 76       |             | 24       |
| 630               |             | 74       |             | 26       |

**Tables S1-S18.** Values of fluorescence time constants ( $\tau_i$ ) and normalized (to 100) pre-exponential factors ( $A_i$ ) of fitting decay functions for IRT in water solution (pH = 1.11–9.46) at different emission wavelengths ( $\lambda_{em}$ ). The excitation wavelength is at 371 nm.



## The Debye-Smoluchowski Model

### *Estimation of the Dielectric Constant*

The dielectric constant of each acidic solution was obtained from literature data.<sup>1</sup>

### *Estimation of the Proton Diffusion Coefficient*

The proton diffusion coefficient  $D_{H^+}$  is estimated using the Nernst equation:

$$D_{H^+} = RT\mu_{H^+} / F^2 \quad (S3)$$

where  $\mu_{H^+}$  is the proton mobility, R is the ideal gas constant, and F is the Faraday constant.

### *Estimation of the Proton Mobility*

The proton mobility was estimated from electrochemical data on equivalent conductance for HCl at several concentrations at 25 °C (concentration (eq dm<sup>-3</sup>))<sup>2</sup> and number of transferred protons in water.<sup>3-7</sup>

### *Estimation of the Diffusion Constant for C1\**

The diffusion constants of C1\*,  $D_{C1^*}$ , was evaluated from the Stokes-Einstein relationship, Equation S4:

$$D = \frac{k_B T}{6\pi\eta R} \quad (S4)$$

where  $\eta$  is the viscosity of the solution. In pure water its value is  $0.35 \times 10^{-5} \text{ cm}^2 \text{ s}^{-1}$ . It was scaled to its value in HCl solutions (HCl-S) using the viscosity ratio  $\eta_{H_2O} / \eta_{HCl-S}$  (the data on the viscosities of the HCl solutions were estimated from Ref. 8).

## The kinetic Equations Extracted for the $1.11 \leq \text{pH} \leq 1.95$ Regime

$$\frac{d[C1^*]}{dt} = - \left\{ \frac{1}{\tau_{C1}} + k_q[H^+] + k_{DPT}^{C1^*}[H^+] \right\} [C1^*] \quad (S5)$$

$$\frac{d[C2^*]}{dt} = k_{DPT}^{C1^*}[H^+][C1^*] - \frac{1}{\tau_{C2}}[C2^*] \quad (S6)$$

where  $1/\tau_{C1}$  and  $1/\tau_{C2}$  are the rate constants for the no-quenched emission of  $C1^*$  and  $C2^*$ , respectively.

The variation of  $[C1^*]$  and  $[C2^*]$  with time is expressed as:

$$[C1^*] = [C1^*]_0 e^{-t/\tau_1} \quad (S7)$$

where  $\tau_1$  is the fluorescence lifetime from ps experiments.

$$[C2^*] = \frac{[C1^*]_0 k_{DPT}^{C1^*} [H^+]}{k_{DPT}^{C1^*} [H^+] + k_q [H^+] + \frac{1}{\tau_{C1}} - \frac{1}{\tau_{C2}}} [e^{-1/\tau_{C2}} - e^{-1/\tau_1}] \quad (S8)$$

From Equation (S8),  $k_{DPT}^{C1^*}$  can be finally evaluated as:

$$k_{DPT}^{C1^*} = \left( \frac{1}{\tau_1} - \frac{1}{\tau_{C1}} - k_q [H^+] \right) [H^+]^{-1} \quad (S9)$$

## References

1. G. J. Janz and R. P. T. Tomkins, *Nonaqueous Electrolytes Handbook*; Plenum Press: New York, 1973.
2. B. B. Conway, *Electrochemical Data*; New York: Elsevier Publishing Co., 1952.
3. S. Cukierman, *Biophys. J.*, 2000, **78**, 1825–1834.
4. D. Marx, M. E. Tuckerman, J. Hutter and M. Parrinello, *Nature*, 1999, **397**, 601–604, and reference therein.
5. D. Laage, and J. T. Hynes, *Science*, 2006, **311**, 832–835.
6. D. Laage and J. T. Hynes, *J. Phys. Chem. B*, **2008**, *112*, 14230–14242.
7. J. M. Headrick, E. G. Diken, R. S. Walters, N. I. Hammer, R. A. Christie, J. Cui, E. M. Myshakin, M. A. Duncan, M. A. Johnson and K. D. Jordan, *Science*, **2005**, *308*, 1765–1769.
8. B. R. Bresiau and I. F. Miller, *J. Phys. Chem.*, **1970**, *74*, 1056–1061.
